# Supplementary material for: RETRACTED: miRNA-193a-3p Regulates the AKT2 Pathway to Inhibit the Growth and Promote the Apoptosis of Glioma Cells by Targeting ALKBH5
Source: Frontiers journal article supplement (doi:10.3389/fonc.2021.600451), 2021-04-23
Supplement: Table_2.XLSX [file Table_2.XLSX]

## Sheet: 三大预测软件结果
Names	total	elements
RNA22 TargetScan miRmap	38	NOP9
		FOCAD
		HNRNPUL2
		GNAO1
		KIT
		CCND1
		ST6GALNAC3
		LPAR3
		IL17RD
		SLC10A6
		MYLK
		ARHGEF15
		GDF11
		ALKBH5
		ANKRD13A
		TGFBR3
		LAMC2
		AJUBA
		HELZ
		IDE
		RSF1
		ERBB4
		TGFB2
		SLC23A2
		DYNLL2
		DCAF7
		MCL1
		CLSTN1
		NSF
		SNX27
		CLCN5
		PLAG1
		FAIM2
		ZFYVE26
		GXYLT1
		C6orf132
		E2F6
		UBP1
RNA22 TargetScan	58	ZHX3
		SPECC1L
		IGSF3
		CECR2
		CCAR1
		SON
		MAPK10
		GMFB
		GABRQ
		SLC39A5
		TANC2
		GLIPR2
		FOXN2
		CSRNP1
		STMN1
		DAAM2
		DIO2
		MYCN
		C18orf32
		NAV3
		RFFL
		ZNF207
		CNNM2
		AAK1
		RBMS1
		KHNYN
		PTEN
		KCNE1
		ZNF248
		ST6GALNAC5
		KDM5C
		CTDSPL2
		CTIF
		SEC31B
		PRR14L
		PLEKHA7
		GREM1
		HEG1
		FAM179A
		SIAH1
		PCDH1
		SOX5
		CAPRIN1
		JMY
		SF3B1
		ETS1
		DST
		FAM83F
		ZC3H11A
		DYRK1A
		CXXC4
		ANK3
		ANAPC15
		ZBTB5
		ING1
		ETV6
		ABCB8
		N4BP3
TargetScan miRmap	71	ATP5F1
		FAT4
		SCYL3
		ZNF385B
		SRSF6
		ATOH8
		MMP16
		LRRC8A
		INO80D
		ABI2
		CNOT6
		MED14
		HOXD13
		SKAP2
		FHDC1
		NT5E
		FLI1
		WDR82
		IGFBP5
		BRPF1
		B4GALNT3
		SLC35D1
		EN2
		PHF15
		FLRT3
		ENTPD1
		LOXL4
		ETV1
		CALM1
		SLC30A9
		PLAU
		NUFIP2
		CALB1
		DUSP7
		ARHGEF12
		GRB7
		ARMC1
		ARNT
		OSMR
		SPOPL
		PLXNC1
		PPTC7
		KIAA1549L
		DYRK2
		AP2M1
		BEST1
		PPP2R5C
		NT5DC3
		FAM168B
		DENND5B
		DOK6
		ARHGAP19
		LAMC1
		CSRNP3
		ZNF618
		CLOCK
		KLF7
		GPR27
		ANKFY1
		TP53INP1
		RAD51L3-RFFL
		FAM84A
		TMEM30A
		SNRPD3
		LRP4
		STX16
		PSEN1
		TAOK1
		SEPN1
		ADCY9
		DNAJC13
RNA22 miRmap	64	MAX
		IPO9
		LUZP1
		HYOU1
		AQP2
		ZC3H6
		RALGPS1
		NSD1
		AMMECR1
		C10orf53
		NET1
		PITPNM2
		KIF5C
		FAM20B
		DMXL2
		LHX4
		ARFIP1
		MOCOS
		DNAJC27
		GAS1
		KANK2
		RAPGEF5
		WDR48
		MKS1
		PLAUR
		HSBP1
		GJA5
		TMEM63A
		TRMT2A
		DHCR24
		IRF1
		ABL2
		CYFIP1
		PRKD3
		ARIH2
		ARPC5
		USP13
		VWA5B1
		RAB6B
		ATM
		PAPPA2
		TXNL1
		PTPRT
		FAF2
		GABPA
		ARHGAP31
		AFF2
		STXBP5L
		BMPR2
		PREB
		RUSC1
		SIX4
		KIAA1456
		ST6GAL2
		NFATC2IP
		NIPA1
		SYT17
		SUDS3
		C2orf50
		NDUFA10
		ONECUT2
		FGD6
		PRKCA
		KBTBD7
TargetScan	119	FARP1
		KCNJ2
		CNBP
		KLHL2
		HIC2
		C2orf49
		BAK1
		MAP3K3
		EED
		GDPD5
		ARHGAP39
		ING5
		RFX3
		ERBB2IP
		CDK17
		RGL1
		IKZF3
		TCF4
		FUBP1
		RPS21
		YWHAZ
		PPARGC1A
		NEDD4L
		DNAJC16
		AL626787.1
		ACAP3
		ABHD17A
		C1GALT1
		RUNX1T1
		TSPAN31
		IRF2BPL
		ZNF608
		GSG1L
		GSR
		SRSF7
		SLC31A1
		TSC1
		KLHL15
		PTPRF
		PSD4
		TBL1XR1
		CBX7
		TNFRSF21
		PDE10A
		SNX22
		MBNL3
		LUC7L3
		PET117
		BICD2
		XXbac-BPG32J3.20
		LAMP2
		ATXN1
		PAK4
		TPM2
		CELSR2
		CD47
		NOVA1
		SP8
		TESK2
		GSE1
		RNF222
		MMP19
		INO80
		MOCS2
		TP53RK
		FAM178A
		KMT2E
		DNAJB1
		SKP1
		AC010336.1
		AL590483.1
		SOS2
		SYN1
		NRIP1
		HYI
		KRAS
		BCL2L2
		TCEA2
		PITX2
		FAF1
		NPAS4
		PAK3
		UBD
		RGS9BP
		PTBP1
		MRPL43
		CTB-54O9.9
		CD34
		SORCS1
		SYT1
		EBAG9
		RORA
		MRPL3
		SLC16A6
		SLC15A1
		BAZ2A
		PPIF
		TMEM260
		MSI2
		DNAJB9
		GPR146
		DBN1
		SMIM14
		TBX20
		C6orf195
		KMT2A
		CADM1
		SRSF2
		BRWD3
		CREBRF
		POLR2J2
		RBM8A
		DDR1
		FAM131B
		ADAMTSL3
		LGR4
		MSANTD2
		TRIB2
		KIAA0825
RNA22	3434	FSTL1
		ACTN4
		TMEM239
		KRTCAP2
		KCNK16
		ABCA3
		SLMAP
		PLCE1
		FAM219A
		CEP250
		MLC1
		DLG1
		PAX7
		C10orf90
		KRTAP4-12
		GNL3
		ITGA5
		BTG2
		MEFV
		CYP26A1
		C10orf25
		TUT1
		TACC2
		SLC4A1
		VPS4A
		BYSL
		ZCCHC16
		PMPCA
		C9orf91
		ANKRD36B
		RNF38
		AEN
		AHDC1
		U2SURP
		SALL1
		NCF4
		GLTP
		OTOP2
		CSPG4
		IGF1
		NAALAD2
		HSD17B2
		G3BP1
		NUP155
		ESYT1
		CXCL3
		TMEM139
		PAK1
		ADCY7
		NBPF12
		HOMEZ
		PLA2G2C
		FRAS1
		SCAF8
		CHRNA10
		TECTA
		HMGCS2
		FAM134B
		EP300
		11-Sep
		MESDC2
		LILRB2
		KLHL14
		KCNA6
		DDX11
		HOXD11
		TRIM74
		SH3BP4
		PADI1
		OR5L1
		CCNB1
		ZEB1
		C4orf22
		ZG16
		CDK14
		ZNF131
		SLC38A5
		SOD2
		CYTH1
		CHD9
		CD2BP2
		CCDC97
		PAPOLA
		KCNK3
		AATK
		KCNK6
		XK
		SLC4A8
		SEMA4D
		MET
		CERK
		AP3S2
		TOB2
		PDLIM2
		TET3
		MAGEA2
		SPN
		ZNF576
		COPS7A
		UNC5A
		HOXA1
		CAPS
		RNF185
		OSBPL8
		FER1L5
		PPCS
		UGT1A1
		SRPK1
		SLC25A52
		PI4KB
		RRP7A
		MED13L
		EVC
		HOXA13
		TEAD1
		SORL1
		SNX33
		PTCD3
		PCOLCE
		NOC4L
		C10orf12
		TMEM184A
		TCEANC2
		FADS1
		PCYT2
		CSF3R
		WDR34
		TSC22D1
		DKK2
		SUGCT
		NMNAT1
		EPT1
		SHC1
		ITGA3
		CMPK2
		RABGGTA
		GEN1
		GGT2
		CDC25B
		WDR89
		RAB19
		PRKCB
		ENTPD3
		ACSM3
		CNBD2
		ZNF623
		PIK3R5
		UTRN
		CDC14A
		COL9A2
		GRPEL1
		BAZ1B
		TBL3
		RPL35
		AGBL4
		TRPM6
		INTS6
		CD160
		NUTM2G
		UCMA
		FOXK2
		CLTA
		SMC3
		PDCD5
		PDIA3
		GPR37L1
		A1CF
		ZFP14
		RFPL2
		ZNF83
		KPNA3
		SCGB1C1
		CD1A
		SRRM4
		SSTR2
		C15orf52
		BIRC5
		PNMA6A
		CARNS1
		WHSC1
		RAPGEF6
		GNAS
		RNF223
		LGI2
		WDR45
		ANKRD6
		SHROOM1
		GHR
		FITM2
		SPTSSA
		DYSF
		KRTAP5-2
		LEPREL2
		GOLGA3
		VWA5A
		MGAT4B
		BBS7
		ZNF345
		KIAA2018
		EXOSC2
		WDR59
		RMND5B
		PKDREJ
		LAIR1
		DUSP4
		SSU72
		A2ML1
		IL17RC
		HS3ST1
		WHSC1L1
		LRRC8D
		FOXM1
		ZBTB48
		SMUG1
		AP3M2
		DNAJC5
		RPS4Y2
		ANGPT4
		RASGRF1
		FBXO11
		AIRE
		RNF4
		IPO4
		EMP2
		EMC1
		C9orf139
		TRIM41
		MRAP
		PLEKHG4
		TEX38
		PIN1
		DUS3L
		FOXI2
		CHST15
		N4BP2L2
		EP400
		CCDC43
		MZB1
		DMRT3
		BTN3A1
		NELFE
		UBR3
		PLEKHG7
		P2RX3
		DNM1
		UGT1A10
		PLIN2
		OTUD3
		YME1L1
		SYT12
		SPPL3
		MYH6
		SERPINE3
		MAP3K13
		LIM2
		IL1F10
		TONSL
		CPEB3
		INTS1
		CAMTA1
		WBSCR22
		KL
		C3orf56
		ASUN
		AIPL1
		ABHD2
		IL24
		ZNF605
		SLC6A6
		SEC14L1
		TAF12
		COL18A1
		ATP1B4
		NUP37
		MPP4
		SLMO1
		PDZD3
		TNXB
		RAB35
		PPP1R9A
		ERLIN2
		TIMM22
		BIRC7
		CDCA4
		TVP23A
		LIMD1
		ADAM19
		FTMT
		CRHBP
		COG1
		DNAL4
		DNAH11
		CELF1
		USP42
		CDC42BPA
		SEC23IP
		SCP2D1
		POLR2J
		CNOT1
		UQCRC1
		TMEM92
		TMEM200A
		POLG
		CEP120
		CCT8
		ADCK4
		B3GALT5
		RICTOR
		NCDN
		EIF3M
		TMEM104
		SERF1A
		CYP1A1
		ATR
		GNA11
		PIP4K2B
		NBPF8
		GPR19
		HVCN1
		NME1-NME2
		GBGT1
		PIK3AP1
		GRIK2
		FAM204A
		SNX25
		RHBDF1
		IGSF11
		TRIP12
		PCDH18
		CHST6
		SENP7
		KCNE3
		TTLL4
		LRRK2
		LIF
		BACE2
		KIAA0355
		USP19
		METTL21A
		ERO1L
		SARS
		PCDHGA1
		KDM2A
		USP32
		QKI
		NUDT12
		LAMB4
		DYNC1H1
		DPPA5
		GLIS2
		ARIH1
		POLDIP3
		ABCF2
		RGPD5
		TMEM125
		OPRK1
		CNTN2
		CHRM1
		C12orf4
		CHRNB2
		SULT1C2
		COL7A1
		SPG20
		NANOS3
		WDR62
		DHX16
		AKNA
		TBC1D3E
		FANCC
		HGH1
		UBXN7
		RARB
		DIDO1
		CEL
		KRT222
		PRRG1
		SPATA31A7
		HLF
		UNG
		TMED9
		TRPV5
		HEPHL1
		LTBR
		C15orf59
		IGDCC3
		MED12
		ABCC11
		NBPF3
		AGTPBP1
		PRR5
		MYH2
		NAALADL2
		FXN
		RPRD1B
		DNHD1
		UTP14C
		FKBP4
		VWA1
		RABEP2
		C11orf68
		HCFC1
		RPP14
		AAMDC
		TENC1
		GFI1
		SMC6
		OSGEP
		FBXO36
		MTR
		C17orf53
		SYTL1
		CBX6
		MAD2L1
		PPP1R12A
		GANC
		CHRNA2
		ASH1L
		GGA1
		RSPO2
		ATP10A
		RBM38
		EMR1
		MLIP
		DDX24
		IRX3
		KCNA4
		GPR132
		DGKD
		IQSEC2
		FRMPD3
		ZNF672
		FAIM3
		PK
		ZNF275
		SPINK5
		MEGF10
		KLF4
		IFITM10
		ANKRD52
		KLHL9
		OPA3
		ARHGEF16
		ACSF2
		BTK
		STRC
		RPS6KA6
		SYTL5
		PIGL
		ECE1
		IDS
		OLFML2A
		HUS1
		DNAJC30
		C6orf62
		FAM189B
		IL22RA2
		HAPLN4
		CDHR1
		SOWAHB
		PTGES3L-AARSD1
		USP4
		SCN3A
		NUAK1
		LSM3
		DCX
		CDSN
		NFYC
		TBX21
		PLSCR4
		RRAD
		KCNJ6
		MAP3K7CL
		FMN1
		VIT
		STRIP1
		CARD14
		RTEL1
		ZNF709
		ASXL2
		FSTL5
		NCOA3
		BRD4
		CYP19A1
		MIA2
		ARFRP1
		KLHL6
		UBTD1
		TTC13
		KIAA0226L
		PIEZO2
		VSTM4
		ATP6AP1L
		CEBPD
		LDLRAD2
		RDX
		CELSR3
		MUC5B
		GRWD1
		FOXL1
		SLC4A5
		MOSPD1
		ITSN1
		SVIL
		NDRG2
		CMYA5
		SVEP1
		KIAA1161
		DCTN1
		CAMK2B
		RAD1
		CXorf23
		ZNF417
		ERMAP
		NFRKB
		GRIP1
		TTC3
		DDX39A
		GDF2
		BFSP2
		OR2H1
		GRM6
		FRMPD4
		MEIS1
		ATP8B4
		FAM114A2
		ZGRF1
		PSTK
		TTC30B
		SLA
		DLST
		C10orf32-ASMT
		TRIM45
		MYCBPAP
		ATP2B2
		NCAPD3
		CNDP2
		VWCE
		ZNRF4
		PSD2
		KCND3
		HARS
		ARHGEF26
		TBC1D3B
		AGO2
		PREX2
		CREBBP
		ABCC12
		LDLR
		ZNF384
		CFAP44
		DSTYK
		KCNG4
		FAM9B
		ZNF649
		GPATCH8
		COL5A2
		KIAA0930
		LRRC56
		DCT
		HLA-DOA
		CSMD3
		KLHL28
		RCAN1
		AOC1
		BRSK1
		UGT1A8
		TMEM189
		LRBA
		CYB5R4
		PECR
		LRP5L
		ASCL2
		SLC38A9
		PCDHGA10
		FNTB
		SH2B1
		MAP7
		PPOX
		POLR1A
		ANTXR1
		ROPN1
		CRCP
		LRRC16B
		TNFRSF1A
		USP9Y
		RAD54B
		ACADVL
		LRP1B
		XAF1
		SPP1
		FBN3
		ENKUR
		BARD1
		ANKDD1A
		JRK
		ZNF157
		ICA1L
		FDX1
		EPS15
		CASC10
		C19orf47
		BTNL3
		EIF2B2
		ZNF593
		TRABD2B
		ZDHHC22
		PHOSPHO2
		EMR2
		ATP6V0A2
		PEX26
		RAB11FIP4
		NF1
		C5orf56
		OLR1
		LRP5
		ADAMTSL4
		TAOK2
		NRAP
		SLC25A34
		EIF5A
		NEGR1
		SSC5D
		ZNF561
		ATP6V1A
		KIAA0753
		ANKRD17
		EFCAB5
		STK3
		TLR5
		ZNF781
		FAM71A
		ANO10
		IGLL5
		CNOT7
		ERMARD
		BTBD9
		GALNT9
		NCKAP5L
		WNK4
		COL19A1
		BEGAIN
		VPS16
		SLC16A2
		FOXRED1
		HHIPL1
		GK5
		EAF1
		USP35
		IL4I1
		SGK2
		TMEM72
		NOTCH2
		SIGLEC1
		SULF2
		CD93
		KLRG1
		CEP164
		TRPM2
		PDCD6IP
		PSMD2
		ZNF740
		AP2B1
		ZNF136
		USP18
		SLC30A7
		ZSCAN12
		SMCHD1
		FAM180B
		IPO5
		UBE2Q2
		UGT2A3
		PCDH15
		ESR1
		USP43
		ZNF565
		SURF4
		KCNN3
		FKBP5
		CHCHD5
		RRAGC
		NFAT5
		LST1
		PARD6A
		ZNF790
		TAF1D
		KCTD17
		FAM186B
		FBXO3
		DVL1
		CCAR2
		ITIH3
		CMKLR1
		TMOD2
		TNFRSF19
		FAM199X
		PLCXD3
		VPRBP
		NARFL
		ZNF750
		IGFN1
		CLN6
		GPRIN2
		ANAPC1
		CPA4
		SIK2
		SH2D3C
		MEGF11
		ZBTB47
		TRIM42
		BAIAP3
		PTP4A3
		CUL3
		BMS1
		SCFD1
		MAGEA3
		KRT74
		ZKSCAN1
		TSPYL5
		GRTP1
		ADCK2
		ZFHX2
		SLC48A1
		CDK16
		KCNMB3
		POFUT2
		NPNT
		RABL6
		PRKACB
		RNF43
		PDE3A
		TRHDE
		KRTAP4-8
		HSD17B7
		TMC6
		PTPN4
		STX5
		RIMS1
		CTCFL
		TEKT2
		WSB1
		GAL3ST1
		DRP2
		SLC19A1
		HN1
		SREBF2
		MAS1
		PARVB
		LAMA1
		PPP6R2
		DMBX1
		AIF1L
		PPM1E
		ZBTB7C
		CDS2
		DOCK4
		GRIN2A
		KANK4
		EEF2K
		CCDC14
		SCARF2
		MAN2C1
		VPS53
		UBL4B
		SLC5A3
		TRMT2B
		TBC1D3L
		C1orf131
		WDR26
		NATD1
		ATP6V1E1
		AMER3
		SUPT16H
		TMEM259
		MUS81
		CERS3
		SOCS3
		POP4
		NLGN3
		AGBL1
		DNASE1L1
		DCAF8L1
		DAG1
		GPR124
		TMEM132A
		OTUB2
		VWA3A
		POU3F2
		PTPN9
		PIANP
		ARID1B
		WNT10B
		PLOD2
		SPNS1
		MIA
		FIGN
		RUNDC1
		RPL27
		IL1RAPL1
		CEMP1
		E2F7
		YES1
		PCSK9
		KNOP1
		LAMA3
		SLC14A2
		APOBEC3F
		PRNT
		SLC11A1
		ZDBF2
		RAB4B
		KIF1B
		ZBTB4
		HUNK
		GNA13
		GPD1L
		FBXO25
		TNFAIP3
		TSPAN14
		NUDT16
		NAA40
		MSTO1
		OR52E5
		TAAR9
		MAPK1IP1L
		NNMT
		GFRA2
		AMPD3
		NPHP3
		ADCYAP1R1
		TESK1
		SNURF
		FBXO7
		CDH20
		CEP104
		CA12
		B9D2
		TBC1D3
		PPP4R1
		STH
		HMGXB4
		CBX2
		RBMXL1
		ALDH5A1
		IKBKAP
		ZSWIM4
		ADAMTS6
		TNFRSF25
		SLIT1
		PEX11B
		DLL4
		SETD3
		NRROS
		GALNT10
		DPP6
		PQLC3
		RPH3A
		LSAMP
		CER1
		C9orf156
		PTGER4
		METAP1
		CCR7
		ZIK1
		MMP24
		ADCY1
		SFTPA1
		RHO
		NLRX1
		FHOD3
		GREB1L
		HMBS
		CCDC47
		SMAP1
		BSG
		CCDC129
		ADAMTS12
		AGPAT6
		C14orf180
		DTX4
		TNRC6B
		RERE
		SRRM1
		TRIM24
		TBC1D16
		NME9
		AJAP1
		TRIP11
		MOCS1
		CYTH4
		SLCO1C1
		PLXNA4
		KRTAP5-11
		TBC1D3I
		ATL1
		KIAA1109
		C3orf62
		SMOC2
		FAM83A
		KIAA1429
		HRNR
		10-Mar
		ITGA10
		ABCC9
		TRIP6
		PPARD
		HMGCR
		NPIPB9
		YBX1
		WDR45B
		PHAX
		LRFN4
		CDH3
		HLCS
		GPR155
		FAM21A
		AK1
		STK24
		FH
		STK10
		SCTR
		SYNPO2L
		INSL6
		DACT2
		SSX3
		HERC1
		NPAS2
		DOCK1
		FAM63A
		MAGEA8
		INPP5F
		MTF2
		HOXB1
		PARVG
		INPP5K
		CASQ1
		CGREF1
		NEU2
		VASH2
		INPPL1
		CACNA1C
		CCDC94
		BUB3
		SP7
		MDGA1
		GGT1
		COL9A1
		VPS35
		5-Sep
		PLBD2
		ZNF664
		VAC14
		ASB4
		SOGA1
		WDTC1
		DCST1
		NUTF2
		HNRNPH1
		COL4A2
		SRCAP
		SLC23A1
		OGFRL1
		HOXD8
		SLC27A6
		DTX2
		MDC1
		GPIHBP1
		GRAMD1B
		FAM126A
		CGNL1
		FLT1
		ERAP2
		TGIF2LY
		PPP2R4
		TMED3
		NLGN4X
		NUCKS1
		IP6K2
		NEIL2
		FSD2
		EXT1
		SIGLEC15
		CDRT1
		EXOC4
		SMAD2
		CCS
		TMEM68
		F2RL2
		CFAP36
		KMT2D
		SLC29A4
		HTR4
		EIF5B
		CENPE
		ZIC5
		SLC35F5
		EMB
		LMNB1
		ATP2C2
		YAE1D1
		TELO2
		COL11A2
		AAR2
		C14orf183
		KRT80
		ASL
		DUSP28
		PM20D1
		RALGAPB
		ZNF365
		KLHDC7A
		PHC1
		C6orf89
		IRX6
		AKR1E2
		SPATA31A3
		PLCH1
		RNF31
		FNDC9
		PCNXL4
		VKORC1L1
		TLN2
		PLA2G12B
		TBCEL
		FOXC2
		MT1E
		HDAC4
		ZNF582
		ADAM29
		CTNNA1
		CTNS
		STK36
		RSG1
		FAAH2
		SPPL2A
		RNASEH2C
		PKN3
		FAM102A
		ELFN2
		CNTD1
		TRPC5
		COMMD1
		NTRK2
		PFKFB2
		TAS2R4
		KIAA0513
		PXMP4
		WDR33
		CYP2S1
		MAPK1
		MRM1
		LCLAT1
		ATP9A
		HN1L
		CTRC
		CHD7
		WDFY3
		LHX4-AS1
		RNF216
		WDR92
		NHLRC2
		AASS
		SHQ1
		ANKH
		API5
		C5orf51
		PAPL;
		C19orf26
		THUMPD3
		MOV10L1
		BIRC6
		RFT1
		RCHY1
		RHOU
		OLFM4
		FTO
		ITGAD
		ADHFE1
		SH3PXD2B
		SAMHD1
		RBM45
		PSD
		GNAZ
		FAM117A
		MYSM1
		TRIM4
		TMEM236
		AK8
		UBE3B
		TMEM38A
		RBM14
		MDM2
		FASTKD5
		FBXW10
		NKAIN4
		CALHM1
		YRDC
		IPPK
		BIVM
		SEC24B
		NBEA
		CXCL2
		EGFR
		RASL12
		DAZAP2
		MAP3K15
		MAML1
		ZC3H8
		ADAM28
		ADAMTS15
		CDHR4
		ARHGAP1
		MEX3A
		KRTAP4-11
		PLGLB2
		MAPKAPK3
		UNC5C
		AFAP1
		PACS1
		CDK13
		PGAP1
		TMEM136
		CAPN2
		SEC22C
		TIAM2
		AKAP6
		C10orf71
		MTMR4
		ACSBG1
		ANKRD36C
		CCNB2
		KLHL38
		TTC39A
		EMC10
		ZNF763
		SIRPA
		ATP5G3
		TRAPPC11
		TBC1D3G
		CSMD2
		ARHGEF28
		TSC22D2
		PRPF31
		PRICKLE4
		TLR7
		STAB1
		DDX3Y
		CEACAM5
		UGT1A7
		MYT1L
		SRGAP2B
		PDLIM4
		UPB1
		SLC22A15
		STX18
		SORCS3
		PDGFA
		ANKHD1
		PDP2
		FCF1
		ARMC9
		PRG2
		TTC8
		POU6F2
		BRD7
		NISCH
		GBP1
		TENM3
		TMEM181
		ZNF408
		ALDH16A1
		MPHOSPH6
		BOD1L1
		WDR7
		MARK2
		AKAP12
		AKR1D1
		CLPTM1L
		MEOX2
		BLCAP
		KIRREL2
		CEMIP
		SFI1
		FAM71E1
		ENPEP
		C14orf79
		AMMECR1L
		MGAT4C
		MINOS1-NBL1
		KIAA1257
		CEP85L
		TUSC3
		TRIM11
		RTP5
		RPL18A
		CCDC17
		HM13
		PLSCR1
		MPP6
		KRTAP4-4
		HSPA12B
		PHACTR2
		LIPG
		UBE2O
		SZT2
		SP140
		ANKRD36
		MUC17
		RPRD1A
		CLDN25
		NOX5
		NCKAP1L
		C1orf167
		SRP54
		FOXI1
		GPR35
		SIGLEC12
		PLEKHH1
		RNASEH2B
		GOLGA2
		RTEL1-TNFRSF6B
		PHF2
		JADE2
		CAMSAP2
		TTI1
		TCAP
		HCFC2
		PLEKHG5
		NCOR1
		EIF4ENIF1
		KRTAP4-9
		CMTR1
		ANKRD44
		CYP3A43
		LILRA1
		DUSP27
		DPF1
		SMPD3
		PDE7A
		BTBD11
		DAXX
		FOXS1
		C16orf72
		LRP2
		GPER1
		C15orf39
		CYBB
		SART1
		CLEC17A
		SCIMP
		CCDC136
		SLC5A10
		PIWIL2
		LMBR1L
		SLC25A20
		TRIOBP
		SYNE1
		MAPK13
		MTHFD1L
		MBTPS2
		TBX18
		PCDHGA8
		C2
		TUBGCP4
		MOBP
		FER
		SLC43A2
		PATE1
		C2CD2L
		EHMT1
		RNPEP
		C12orf74
		CHEK2
		TMEM97
		WDR27
		PDE6B
		DLGAP3
		MRPS16
		KRT18
		MACC1
		CDAN1
		IL17RA
		BTBD18
		GGCX
		FBXL17
		PDZD2
		BHLHE40
		SPA17
		LHFP
		CAMK4
		IST1
		CRAMP1L
		GALNT14
		KANSL3
		RAB22A
		NPLOC4
		ROBO3
		TRIM28
		SLC24A1
		PJA1
		LRSAM1
		HDAC11
		WFDC2
		PLXNB2
		MPV17
		PSMD4
		DNAH10
		ARMS2
		COL16A1
		GRIK3
		GPR56
		GAS2
		RNF24
		NUMB
		SLC29A1
		CELF2
		PSKH1
		MINA
		ZBED4
		BPIFA3
		ZNF720
		XRN1
		NABP1
		METTL24
		GPAM
		SSR1
		RBFOX2
		SNRNP35
		TIMELESS
		PLIN5
		PGR
		MYOZ3
		SPATA6L
		GRK4
		PRPH
		FBXL7
		FAM9A
		CCDC87
		POLR2A
		PKD1L3
		ZNF26
		ZNF169
		ODC1
		TCTE1
		PHF8
		CIRH1A
		TDRD6
		SLITRK2
		POLE
		H2AFV
		RC3H2
		MAPK11
		SMTN
		CCDC180
		PDE4DIP
		PKIA
		NAB1
		ASIC4
		NKPD1
		DGKA
		DDX59
		RIC8B
		TNNI1
		ZNF143
		TSPAN18
		SAMD15
		TNFRSF18
		SGSH
		PCBD1
		NLRP8
		GIPC3
		GALT
		P4HA1
		GOSR2
		PLG
		LBHD1
		TACR3
		SLC7A7
		GDPD2
		SLC35C1
		IL10RA
		KIF1A
		CKAP2L
		SMCO1
		SEZ6L
		RSPRY1
		SYDE1
		ADAMTS3
		MKI67
		PANK2
		ASH2L
		ICAM3
		CNTNAP5
		DCAF10
		GLI2
		SHROOM4
		TGIF1
		RBM41
		LENG1
		CCDC69
		CLSPN
		ZFAND5
		RGS12
		RAPGEF2
		MAFG
		ATP6V1G2
		PLEKHD1
		ZSCAN23
		PLGLB1
		CDH7
		SMG7
		OR51E2
		SMIM5
		ZNF628
		C2orf68
		SLC41A1
		PRRG3
		OSBP2
		ZNF438
		SAA4
		FAM124A
		PURB
		NLRP1
		UNC80
		TMEM78
		SLC39A10
		PTGFRN
		MCUR1
		MED24
		PDCD1
		ILDR2
		EHD1
		ZNF512B
		GPR25
		NBL1
		LRRN4CL
		ATP6V0A1
		TMEM229B
		MARCKSL1
		MIPOL1
		RAB11FIP5
		BAG4
		ZNF469
		SLC2A4RG
		DGKE
		CHURC1-FNTB
		MPHOSPH9
		C15orf32
		HCN4
		ZNF746
		HFE2
		CUL7
		CD84
		RNF10
		USP36
		GABRG2
		CTNND1
		FAM231D
		FAT1
		NUDCD3
		ERMN
		OLFML3
		KRTAP4-7
		GCNT3
		DNAJC17
		S100PBP
		GATA2
		FAM170A
		C20orf194
		MBOAT4
		ATP10D
		LCP1
		DOK2
		CFLAR
		KIRREL
		GALNT8
		LZIC
		GPC3
		KIAA0226
		SV2A
		CFAP97
		FAM210B
		CYB5D1
		PTPRJ
		PTRH2
		DMD
		ADM
		STAMBP
		FAM205A
		STAMBPL1
		ADCY2
		ABCB6
		UCN3
		ZMAT2
		RABGAP1L
		TCF20
		MLKL
		FCGR1A
		RPP25L
		FOXH1
		ACP6
		OTULIN
		GRAP
		ELMSAN1
		AKAP8
		KCNC2
		ASXL1
		SNX8
		BOC
		CCBE1
		DLG5
		PER1
		ANO8
		C10orf105
		STX1B
		NFXL1
		USO1
		MTCP1
		VMA21
		JAKMIP3
		GPR63
		ASTN1
		UBALD2
		LDB1
		FOSB
		CAV2
		MIA3
		TMEM135
		ARHGAP35
		MED26
		IL1B
		BCL6B
		CAPN15
		ZKSCAN3
		MFAP1
		CHRM3
		USP50
		PREX1
		PLEKHG1
		NEURL1B
		SLC25A45
		RIMKLA
		MAPKBP1
		WRAP53
		DCHS1
		TRIM46
		INPP4A
		IGF2R
		SBSN
		MBOAT7
		ERICH1
		ARHGEF25
		HOXA11
		FAM181A
		APEX2
		TGFB1I1
		KIAA1462
		LY9
		LRRC27
		ATP2B3
		SNRNP200
		ZBTB3
		DDX25
		TSTD2
		ALAS2
		TSGA13
		ZBTB7B
		NPY4R
		RIMS4
		ORC4
		RAD54L2
		IGFBP3
		TXN2
		MPRIP
		KLF13
		DNAL1
		CRTC1
		AP5S1
		UPF2
		ARHGAP24
		ALB
		MED19
		SREBF1
		EIF3CL
		NOD2
		ACTBL2
		SCMH1
		COL11A1
		GPR68
		FUK
		TXLNB
		R3HDM1
		NBPF14
		CYP8B1
		SCN10A
		PITPNC1
		GBP5
		FBXO6
		CX3CR1
		POU3F3
		C2orf88
		POU2F1
		MLLT11
		COX7C
		PEX12
		DPPA4
		OLFM3
		KCNMB4
		INADL
		FUT2
		GDF7
		PTCHD1
		SBNO1
		P2RX7
		PNMA3
		N6AMT2
		GNA12
		PLEKHA5
		KCNJ11
		CDC42EP1
		KNCN
		KIAA0101
		TSPAN17
		TPR
		ZBTB25
		TRMT1L
		TTLL5
		AKAP11
		FBXO28
		GCN1L1
		C15orf54
		METTL17
		IGSF22
		USP28
		NRK
		ADAM11
		ATP6V0E2
		TNPO2
		PARP9
		PEAR1
		AUTS2
		CDA
		SYNM
		HAP1
		MRPL30
		PTDSS2
		STON1-GTF2A1L
		COL27A1
		SAMD4B
		KDSR
[truncated: 1,947 more rows]
